# Supplementary material
Source: publisher figshare collection journal article supplement (https://frontiersin.figshare.com/ndownloader/files/25788461)
Supplement: Supplementary file [file 25788461]

## *Supplementary Material*

### 1 Supplementary Figures

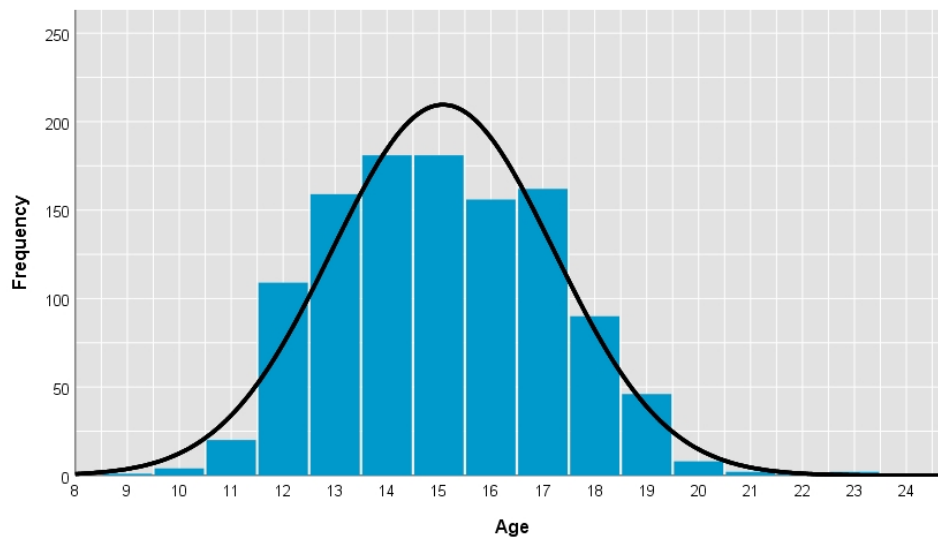

**Supplementary Figure 1.** Age distribution ( $N = 1,143$ ).

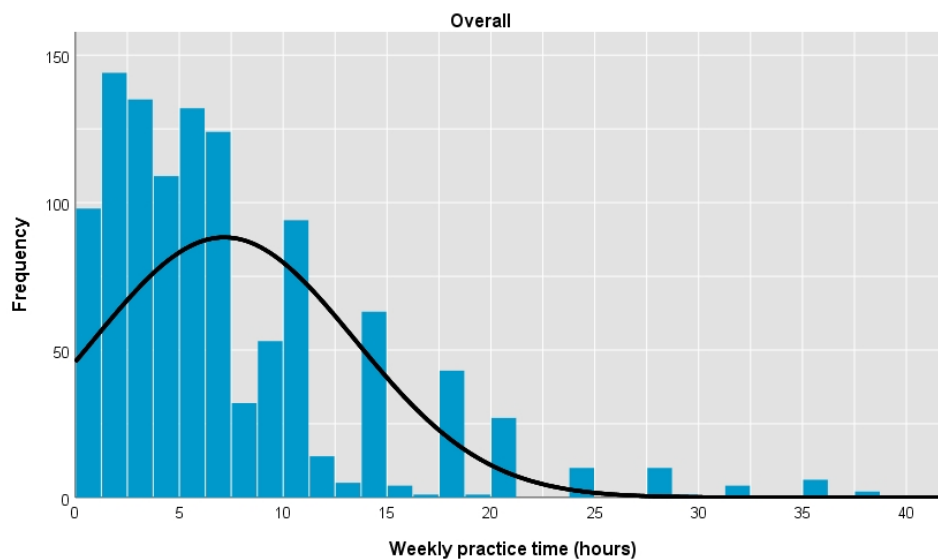

**Supplementary Figure 2.** Distribution of the weekly practice time, full sample ( $n = 1,070$ ).

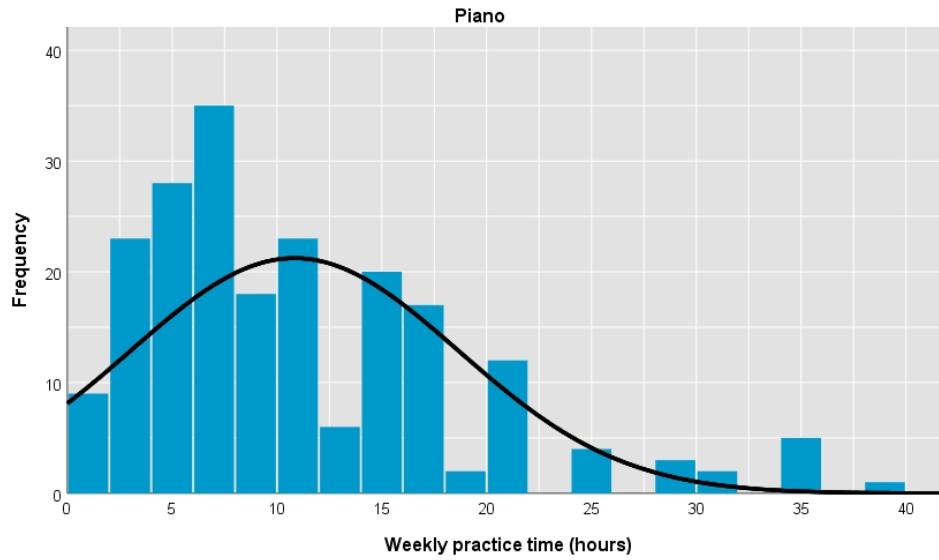

**Supplementary Figure 3.** Distribution of the weekly practice time, piano ( $n = 208$ ).

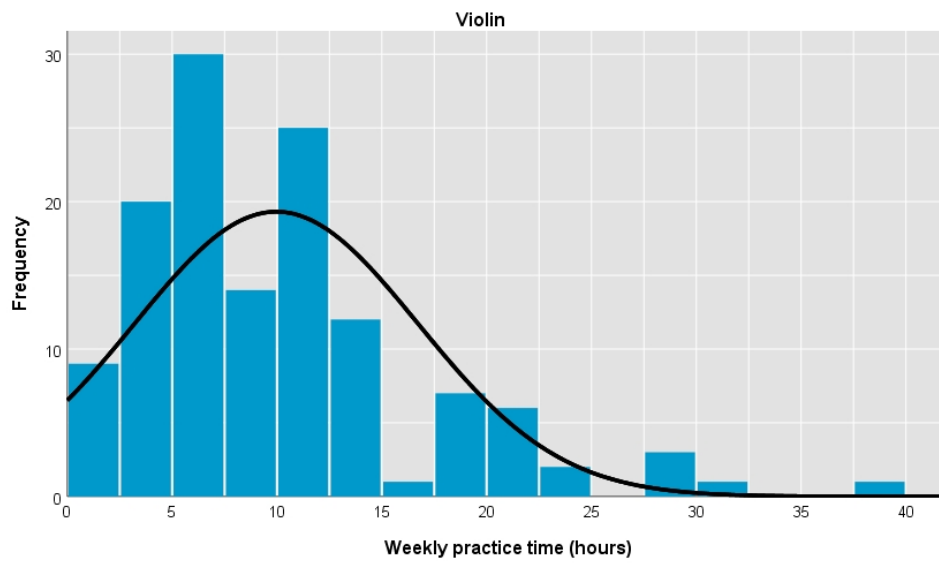

**Supplementary Figure 4.** Distribution of the weekly practice time, violin ( $n = 131$ ).

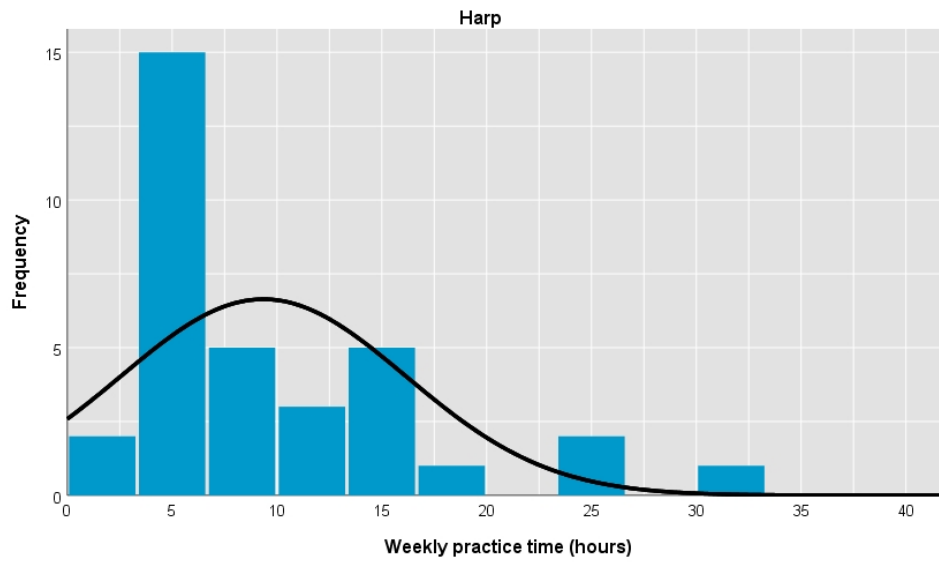

**Supplementary Figure 5.** Distribution of the weekly practice time, harp ( $n = 34$ ).

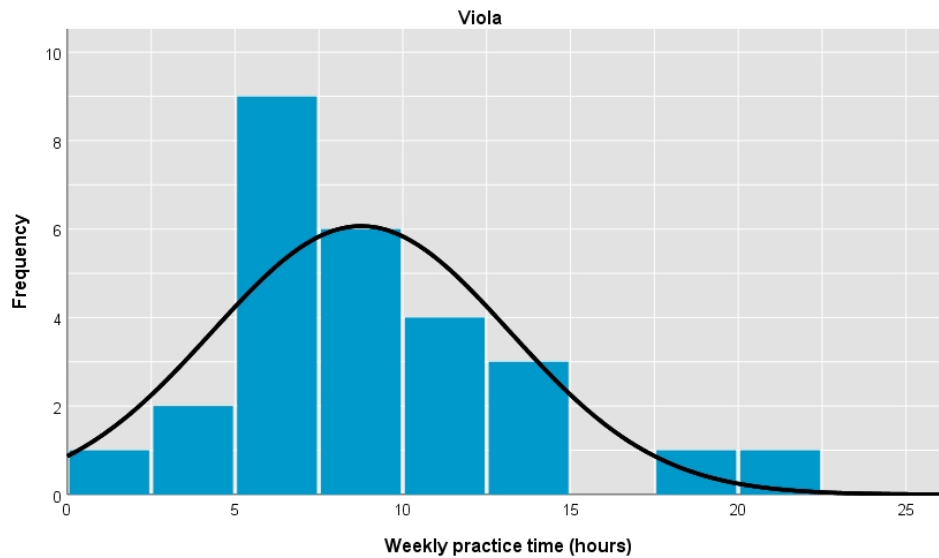

**Supplementary Figure 6.** Distribution of the weekly practice time, viola ( $n = 27$ ).

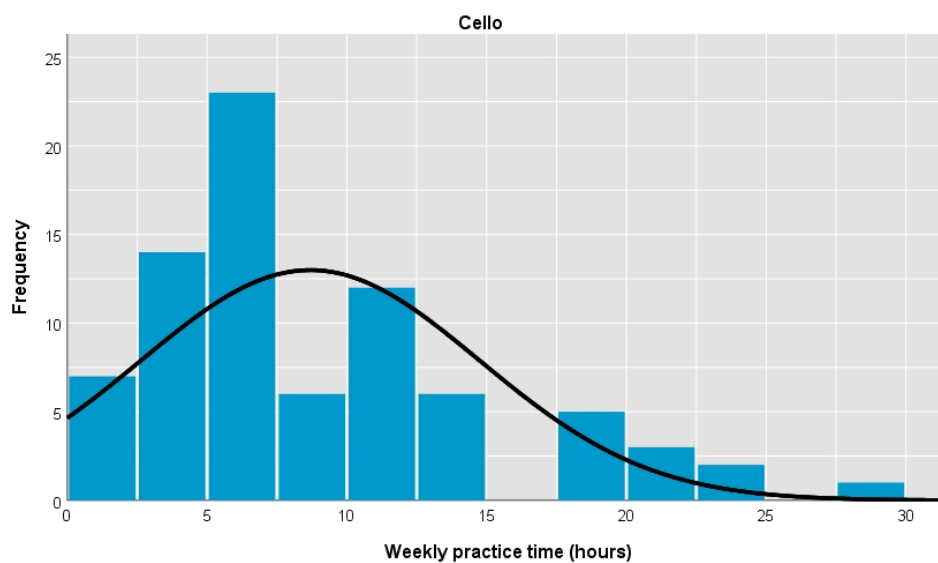

**Supplementary Figure 7.** Distribution of the weekly practice time, cello ( $n = 79$ ).

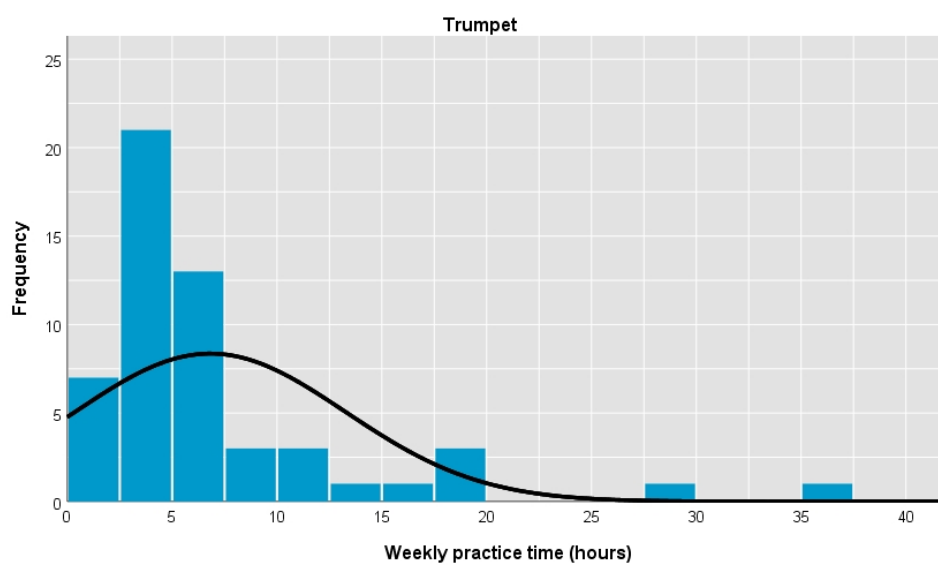

**Supplementary Figure 8.** Distribution of the weekly practice time, trumpet ( $n = 54$ ).

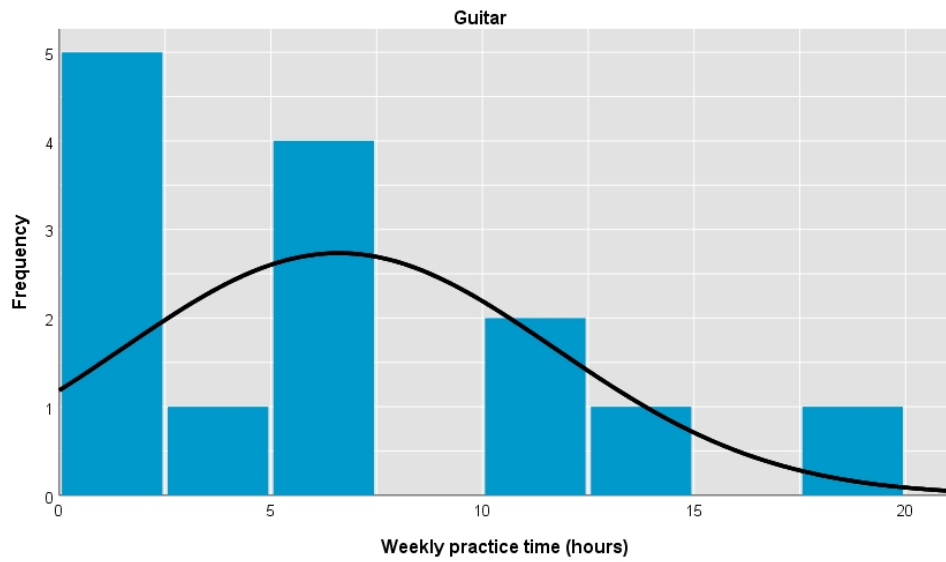

**Supplementary Figure 9.** Distribution of the weekly practice time, guitar ( $n = 14$ ).

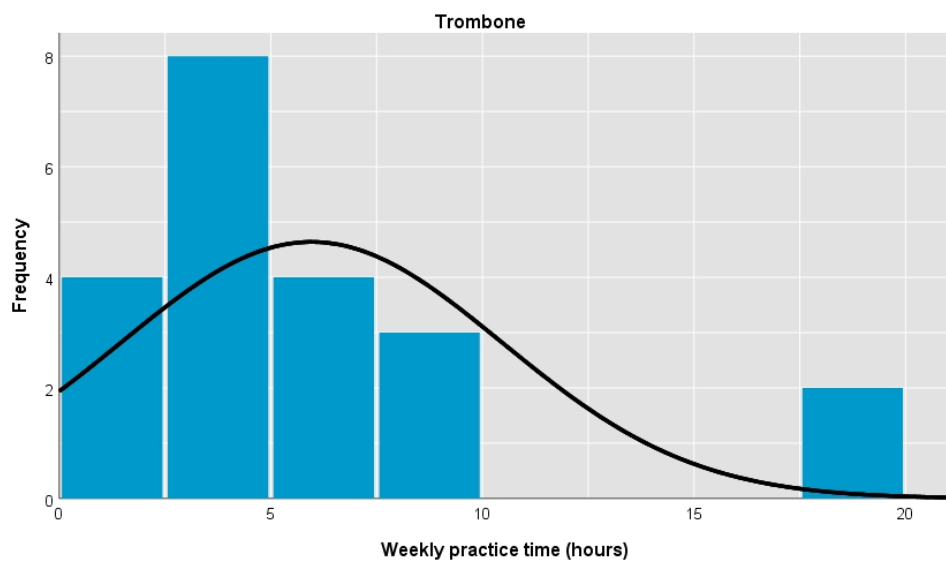

**Supplementary Figure 10.** Distribution of the weekly practice time, trombone ( $n = 21$ ).

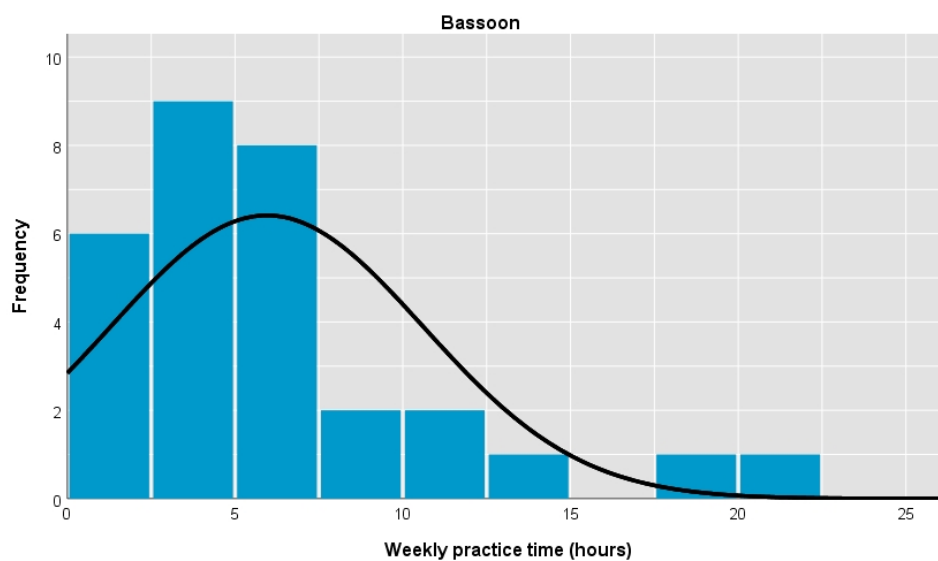

**Supplementary Figure 11.** Distribution of the weekly practice time, bassoon ( $n = 30$ ).

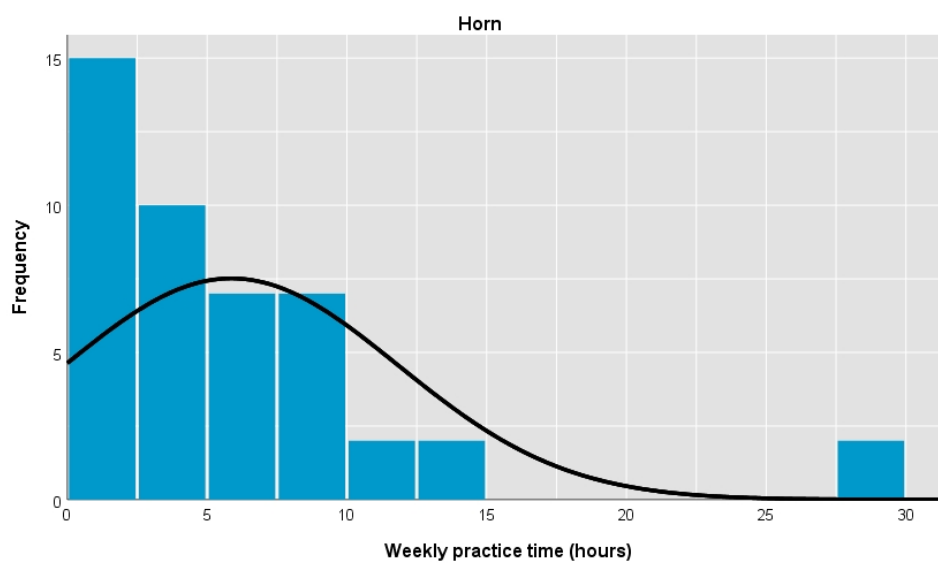

**Supplementary Figure 12.** Distribution of the weekly practice time, horn ( $n = 45$ ).

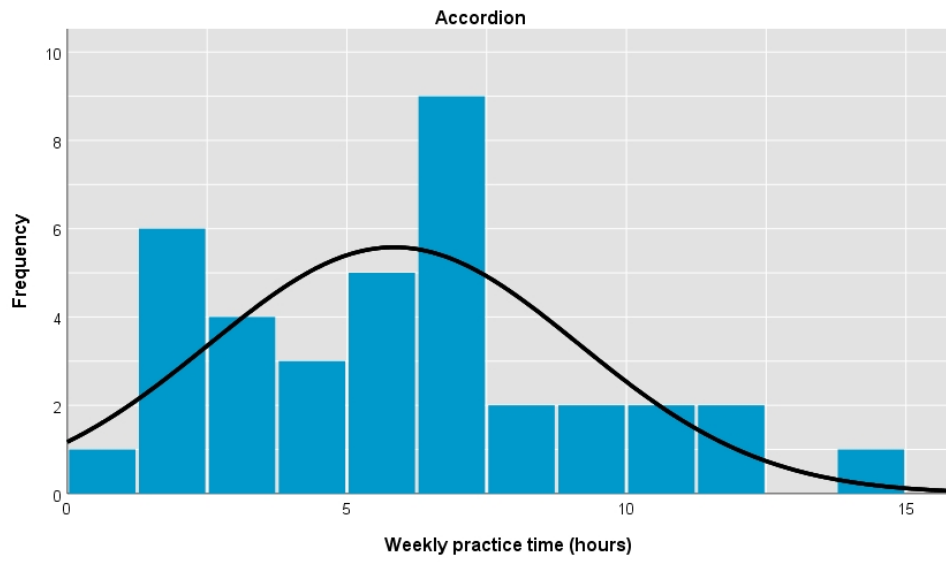

**Supplementary Figure 13.** Distribution of the weekly practice time, accordion ( $n = 37$ ).

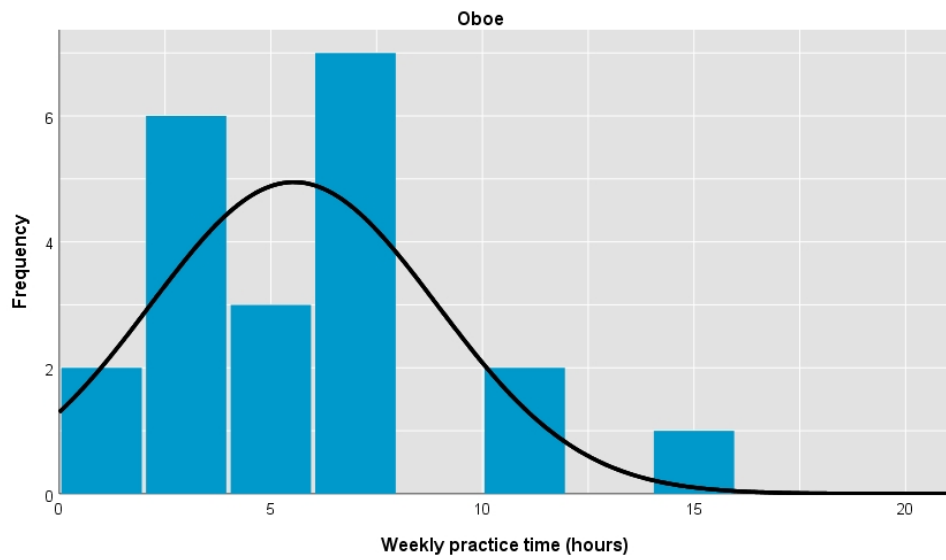

**Supplementary Figure 14.** Distribution of the weekly practice time, oboe ( $n = 21$ ).

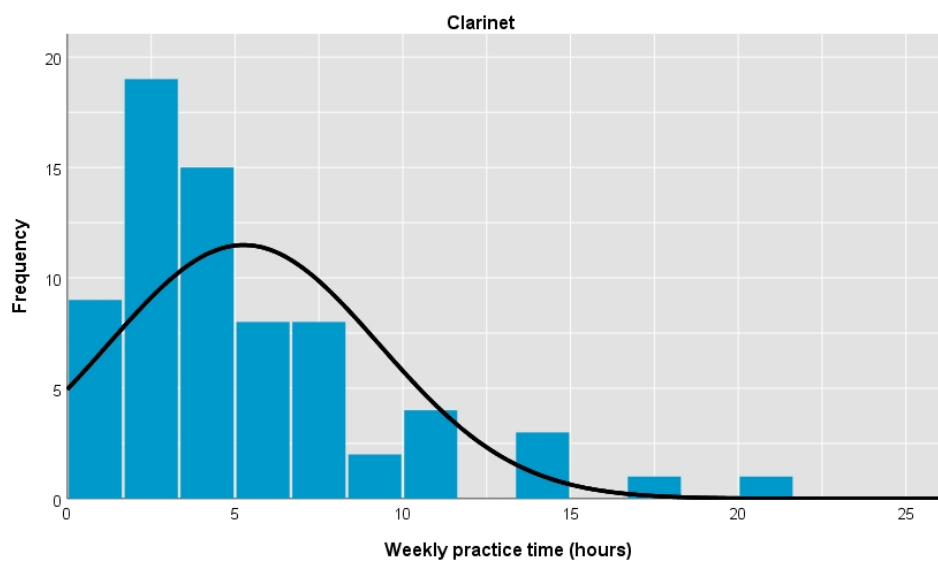

**Supplementary Figure 15.** Distribution of the weekly practice time, clarinet ( $n = 70$ ).

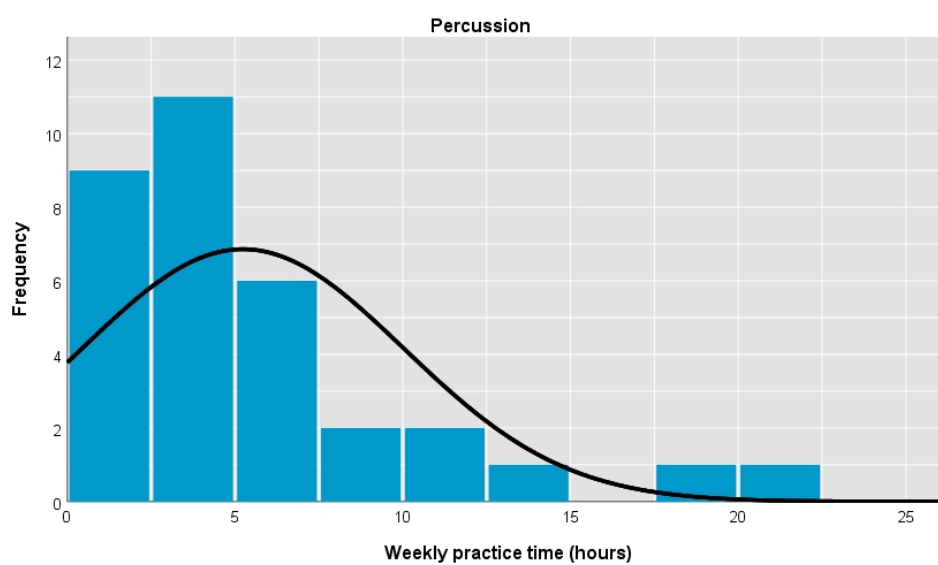

**Supplementary Figure 16.** Distribution of the weekly practice time, percussion ( $n = 33$ ).



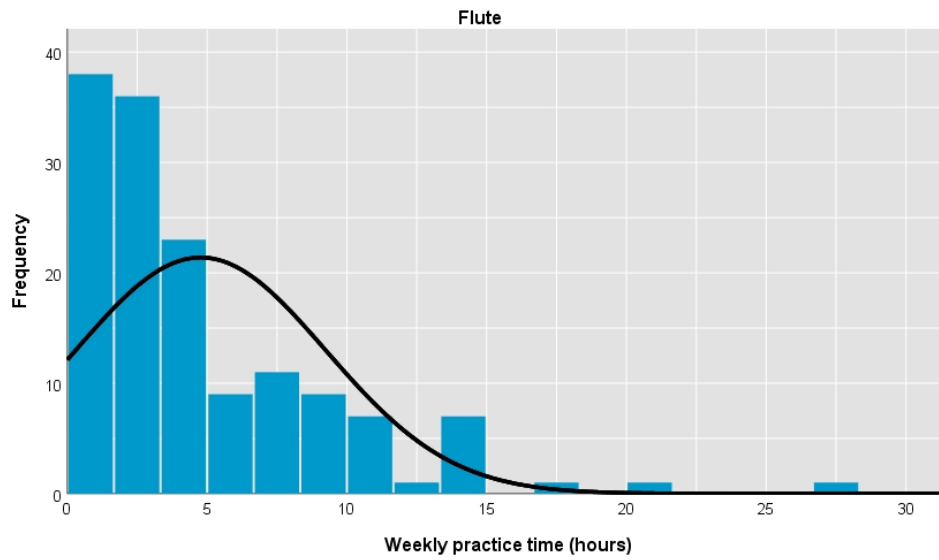

**Supplementary Figure 17.** Distribution of the weekly practice time, flute ( $n = 144$ ).

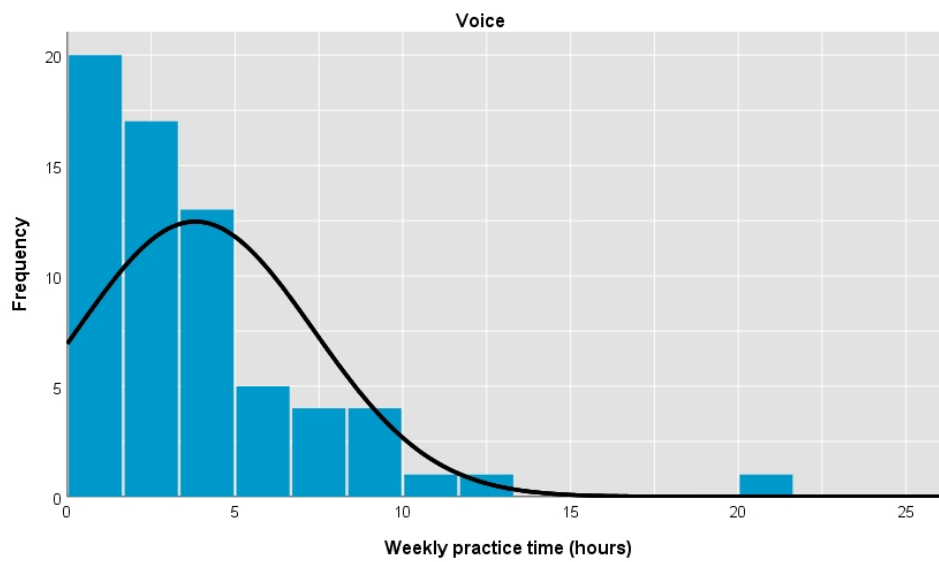

**Supplementary Figure 18.** Distribution of the weekly practice time, voice ( $n = 66$ ).

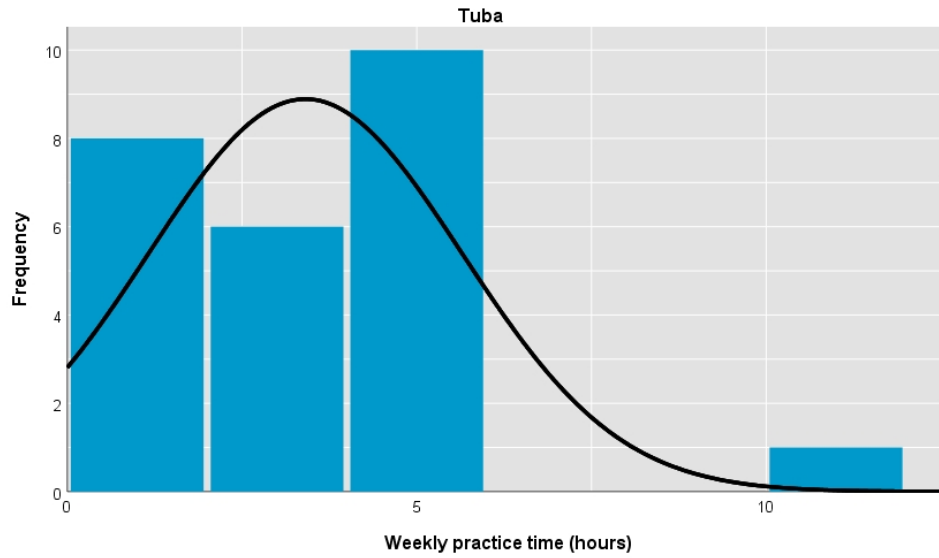

**Supplementary Figure 19.** Distribution of the weekly practice time, tuba ( $n = 25$ ).

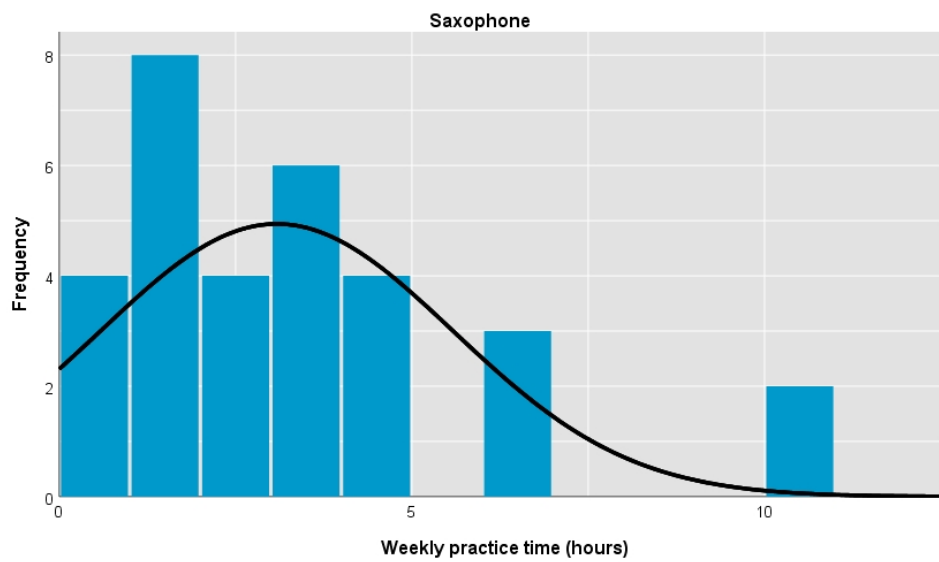

**Supplementary Figure 20.** Distribution of the weekly practice time, saxophone ( $n = 31$ ).

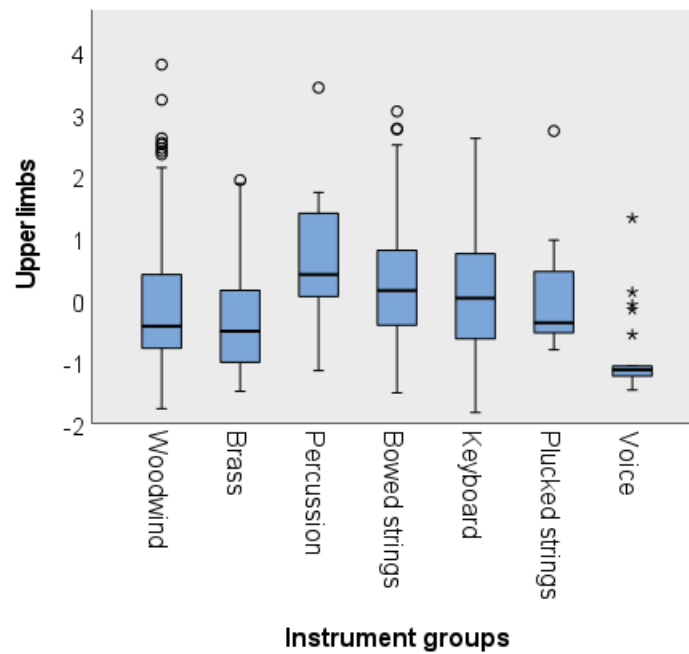

**Supplementary Figure 21.** Boxplots for z-standardized frequency of PRP in hands, fingers, wrists, arms (scale "upper limbs") in different instrument groups ( $n = 549$ ).

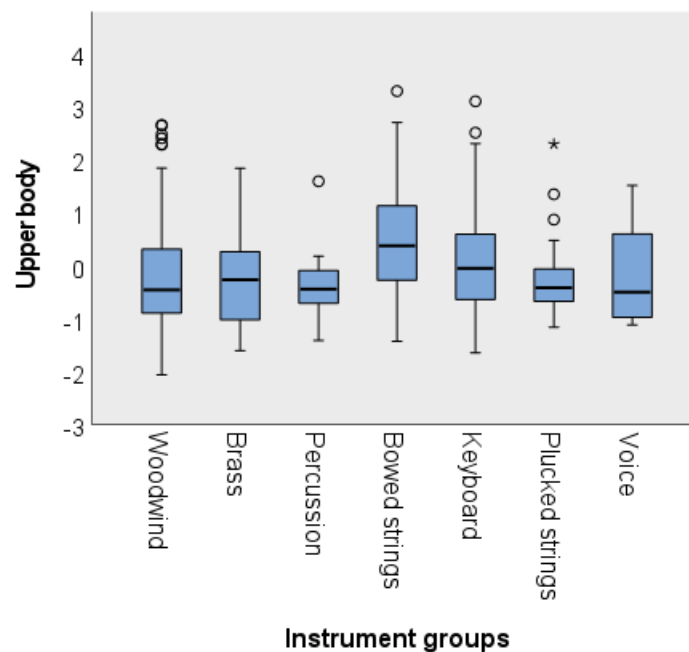

**Supplementary Figure 22.** Boxplots for z-standardized frequency of PRP in back, neck, shoulders, head (scale "upper body") in different instrument groups ( $n = 549$ ).

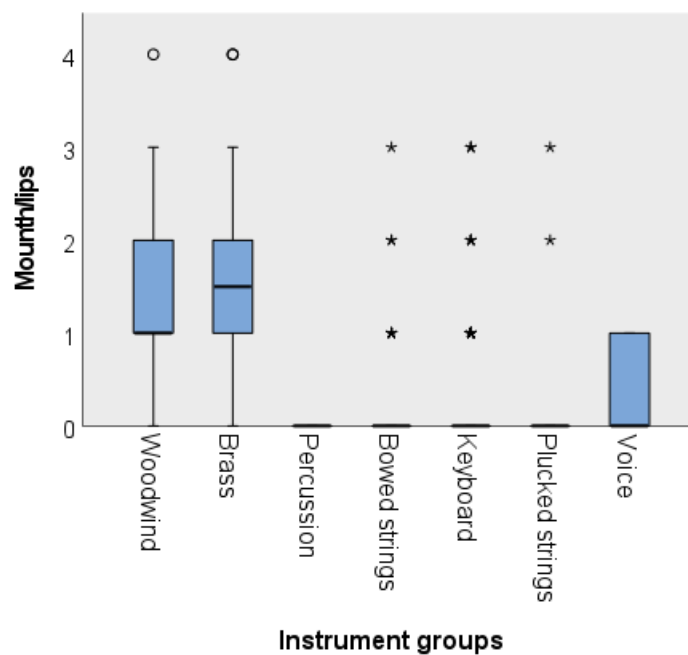

**Supplementary Figure 23.** Boxplots for frequency of PRP in mouth/lips in different instrument groups ( $n = 625$ ).

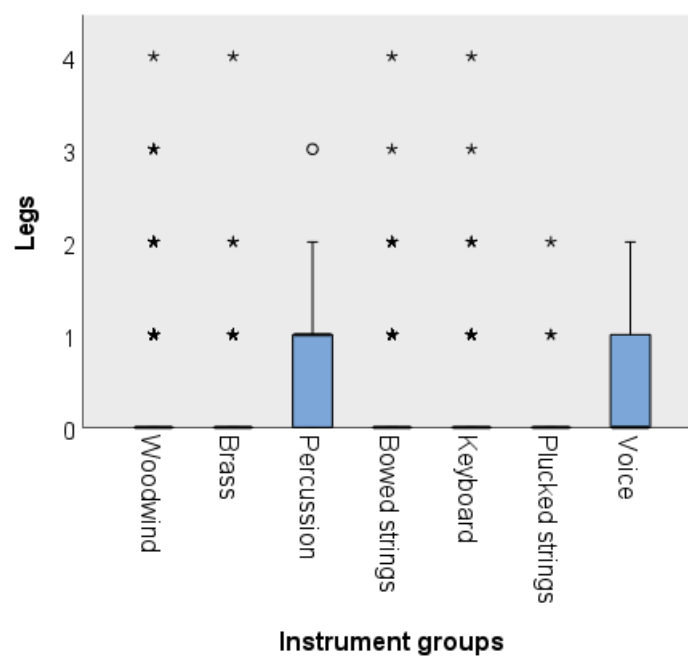

**Supplementary Figure 24.** Boxplots for frequency of PRP in legs in different instrument groups ( $n = 612$ ).

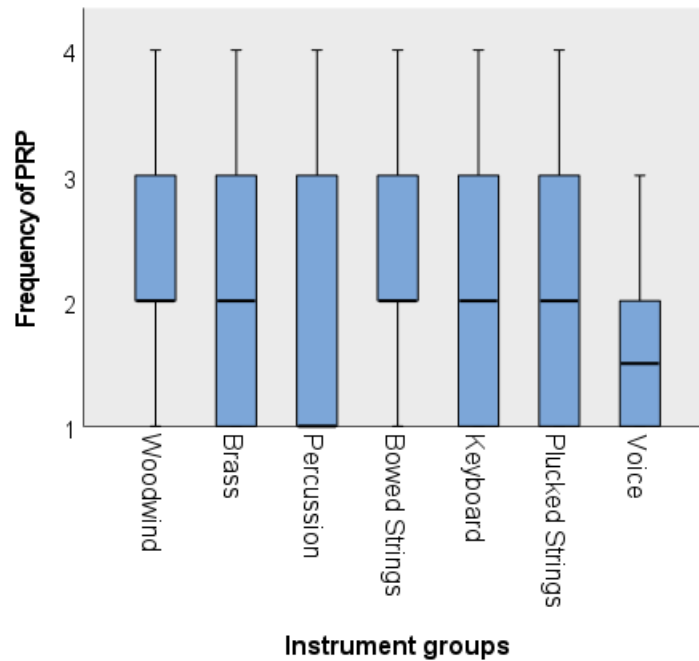

**Supplementary Figure 25.** Boxplots for frequency of PRP in different instrument groups ( $n = 820$ ).

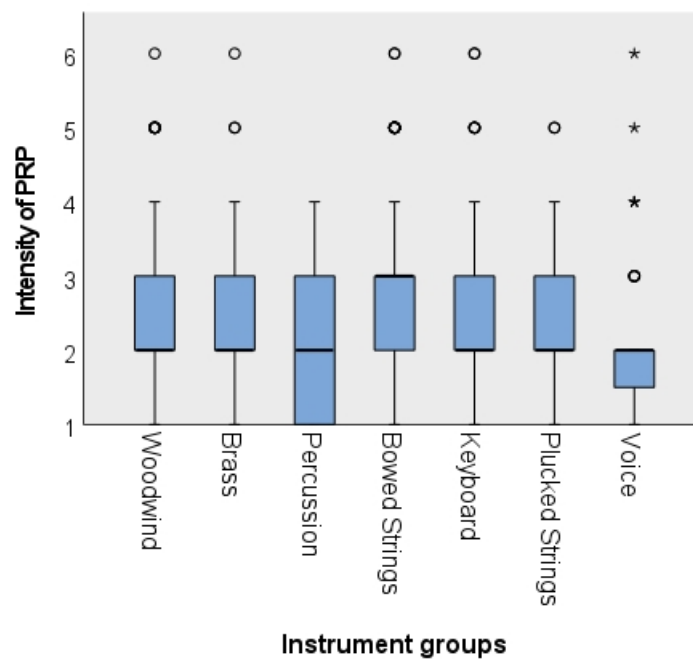

**Supplementary Figure 26.** Boxplots for intensity of PRP in different instrument groups ( $n = 743$ ).

## 2 Supplementary Excerpt from the Questionnaire

### Health (translation)

**Has it ever happened that something hurt you while playing your instrument / while practicing or after playing?**

☐ No, I have never had pain when making music / practicing.

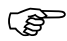

Please skip the following questions and continue with question 36.

☐ Yes, I have had pain when making music / practicing before.

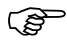

Please fill out the following table.

| <b><u>Body area</u></b> | <b>Always</b> | <b>Often</b> | <b>Frequently</b> | <b>Seldom</b> | <b>Never</b> |
|-------------------------|---------------|--------------|-------------------|---------------|--------------|
| Mouth / Lips            | 4             | 3            | 2                 | 1             | 0            |
| Neck and shoulder area  | 4             | 3            | 2                 | 1             | 0            |
| Arms                    | 4             | 3            | 2                 | 1             | 0            |
| Hands                   | 4             | 3            | 2                 | 1             | 0            |
| Wrist                   | 4             | 3            | 2                 | 1             | 0            |
| Fingers                 | 4             | 3            | 2                 | 1             | 0            |
| Legs                    | 4             | 3            | 2                 | 1             | 0            |
| Back                    | 4             | 3            | 2                 | 1             | 0            |
| Head                    | 4             | 3            | 2                 | 1             | 0            |
| Other, namely:<br>_____ | 4             | 3            | 2                 | 1             | 0            |

**Do you have any other pain that has nothing to do with practicing?**

☐ No      ☐ Yes, that is: \_\_\_\_\_

**If you have indicated pain while playing/practicing, how strong is the pain?**

Very low

Very strong

1

2

3

4

5

6

**Can you remember the first time you had pain while practicing?**

- ☐ Always                      ☐ Already longer, for about \_\_\_\_\_ years now  
☐ Not yet that long, since about \_\_\_\_\_ month(s)

**Have you ever been to a doctor because of the pain while practicing?**

- ☐ No              ☐ Yes

**What do you do if something hurts you while practicing?**

(If true, you can also tick several items.)

- ☐ I take a break.                      ☐ I practice less.  
☐ I relax, and I do it this way: \_\_\_\_\_  
☐ I am doing something different: \_\_\_\_\_

**Have you ever told anyone about the pain when you practice?**

(If true, you can also tick several items.)

- ☐ My mother    ☐ My father    ☐ Friends    ☐ Instrumental teacher  
☐ Other persons, namely: \_\_\_\_\_

**Do you feel that your pain is taken seriously when you practice?**

- ☐ No              ☐ Yes              ☐ Partially

**Do you do sports?**

- ☐ No              ☐ Yes, about \_\_\_\_\_ times per week.
